# Supplementary material for: The Adaptive designs CONSORT Extension (ACE) statement: a checklist with explanation and elaboration guideline for reporting randomised trials that use an adaptive design
Source: PubMed Central journal article supplement (PMC7298567; doi:10.1136/bmj.m115), 2020-06-17
Supplement: dimm050350.w4.pdf [file dimm050350.w4.pdf]

**Appendix D: An example of a CONSORT flowchart for reporting a 2-stage adaptive design (e.g. inferential seamless) that use combination test methods**

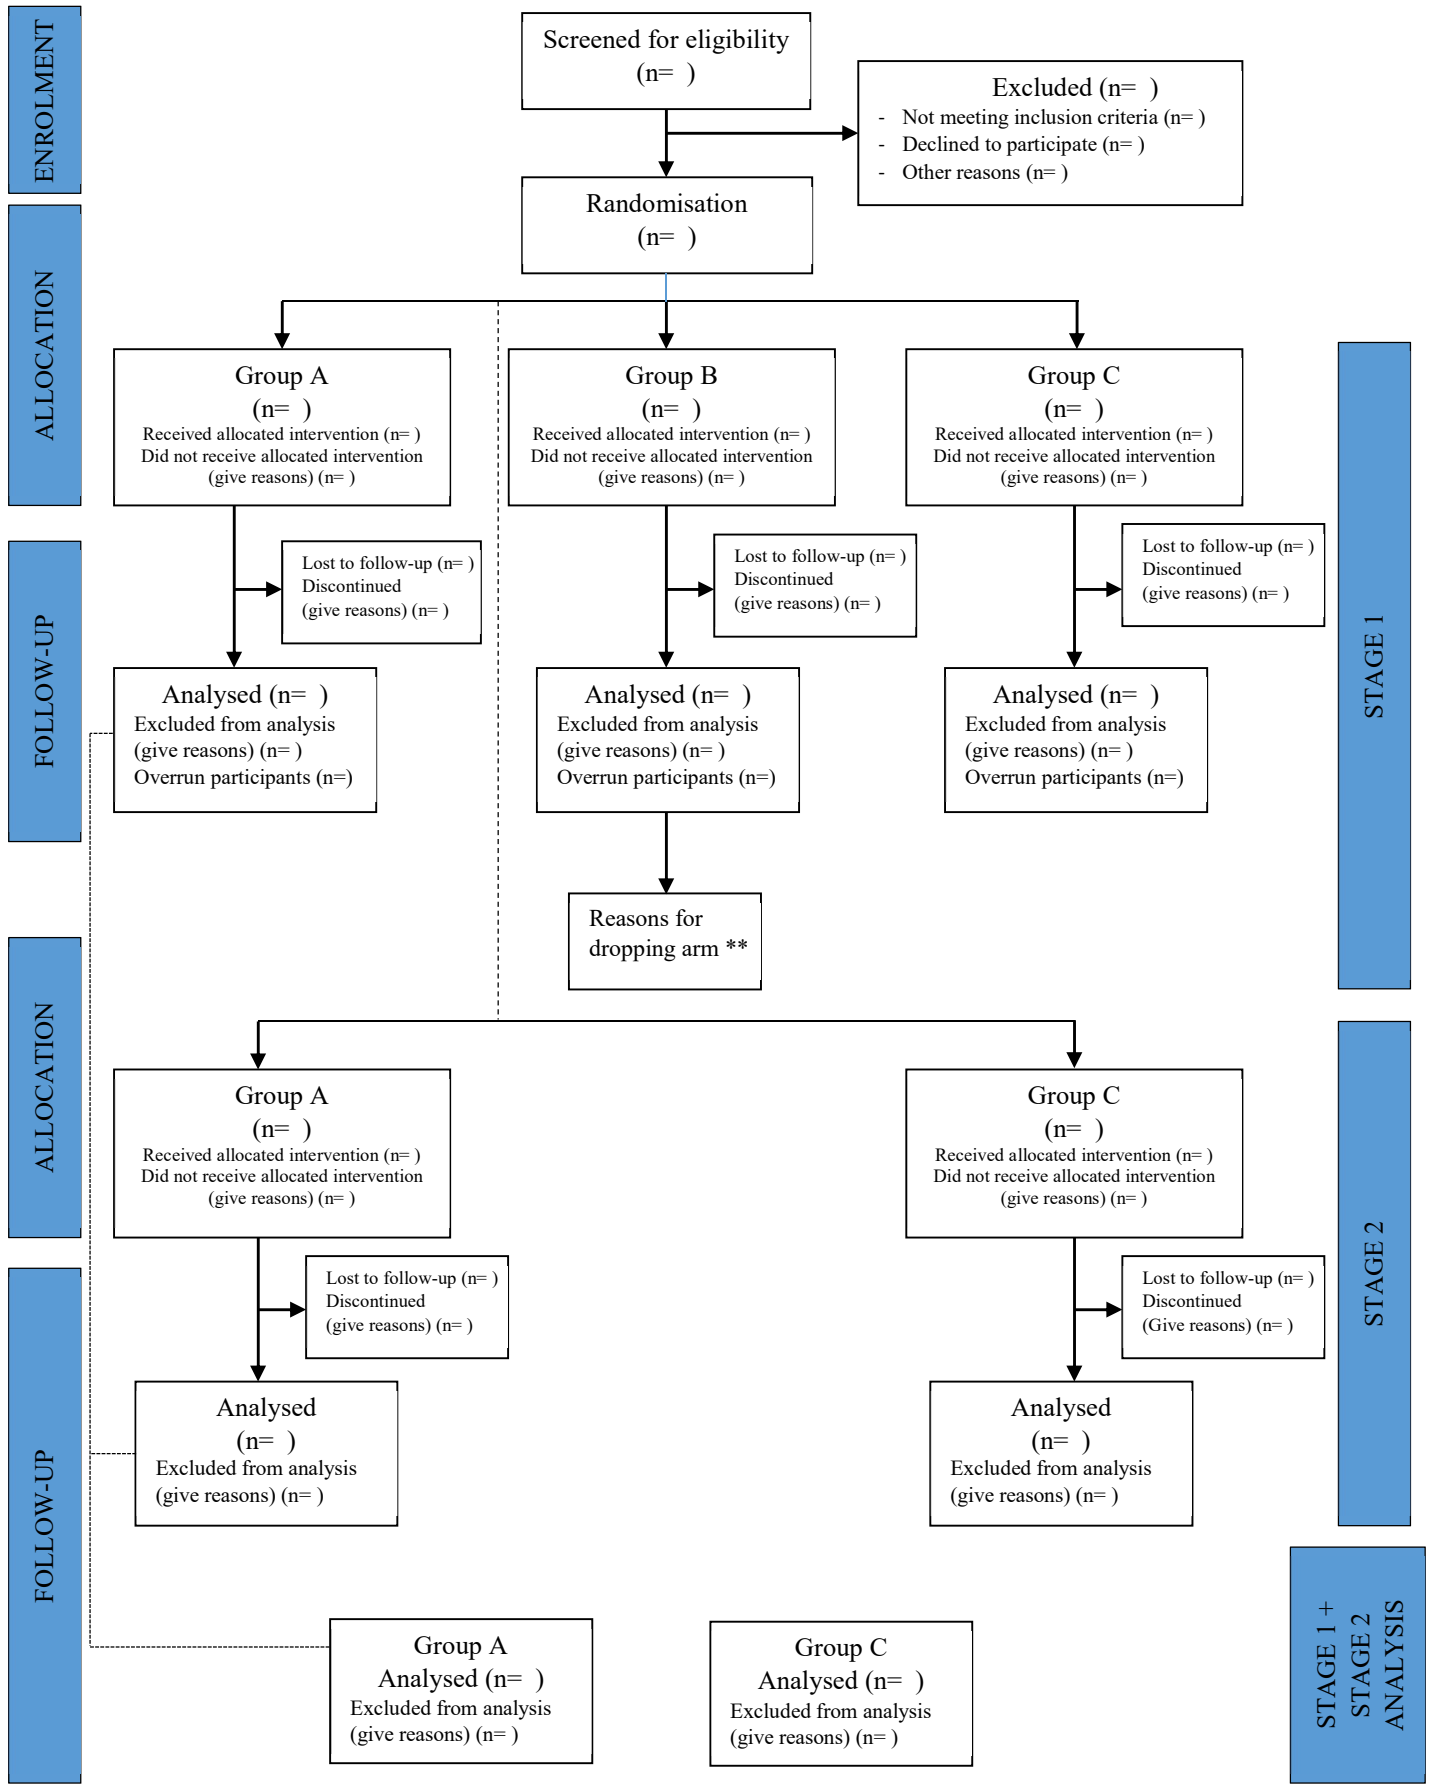

\*\* This can be extended to reflect any further analysis that was performed after an interim analysis when a treatment arm was stopped (e.g. to include overrun participants who did not contribute to the interim analysis or long-term outcome data)
