# Supplementary material for: The Adaptive designs CONSORT Extension (ACE) statement: a checklist with explanation and elaboration guideline for reporting randomised trials that use an adaptive design
Source: PubMed Central journal article supplement (PMC7298567; doi:10.1136/bmj.m115), 2020-06-17
Supplement: dimm050350.w5.pdf [file dimm050350.w5.pdf]

**Appendix E: An example of a CONSORT flowchart for reporting a population enrichment adaptive design (assuming enrichment was done at an interim analysis)**

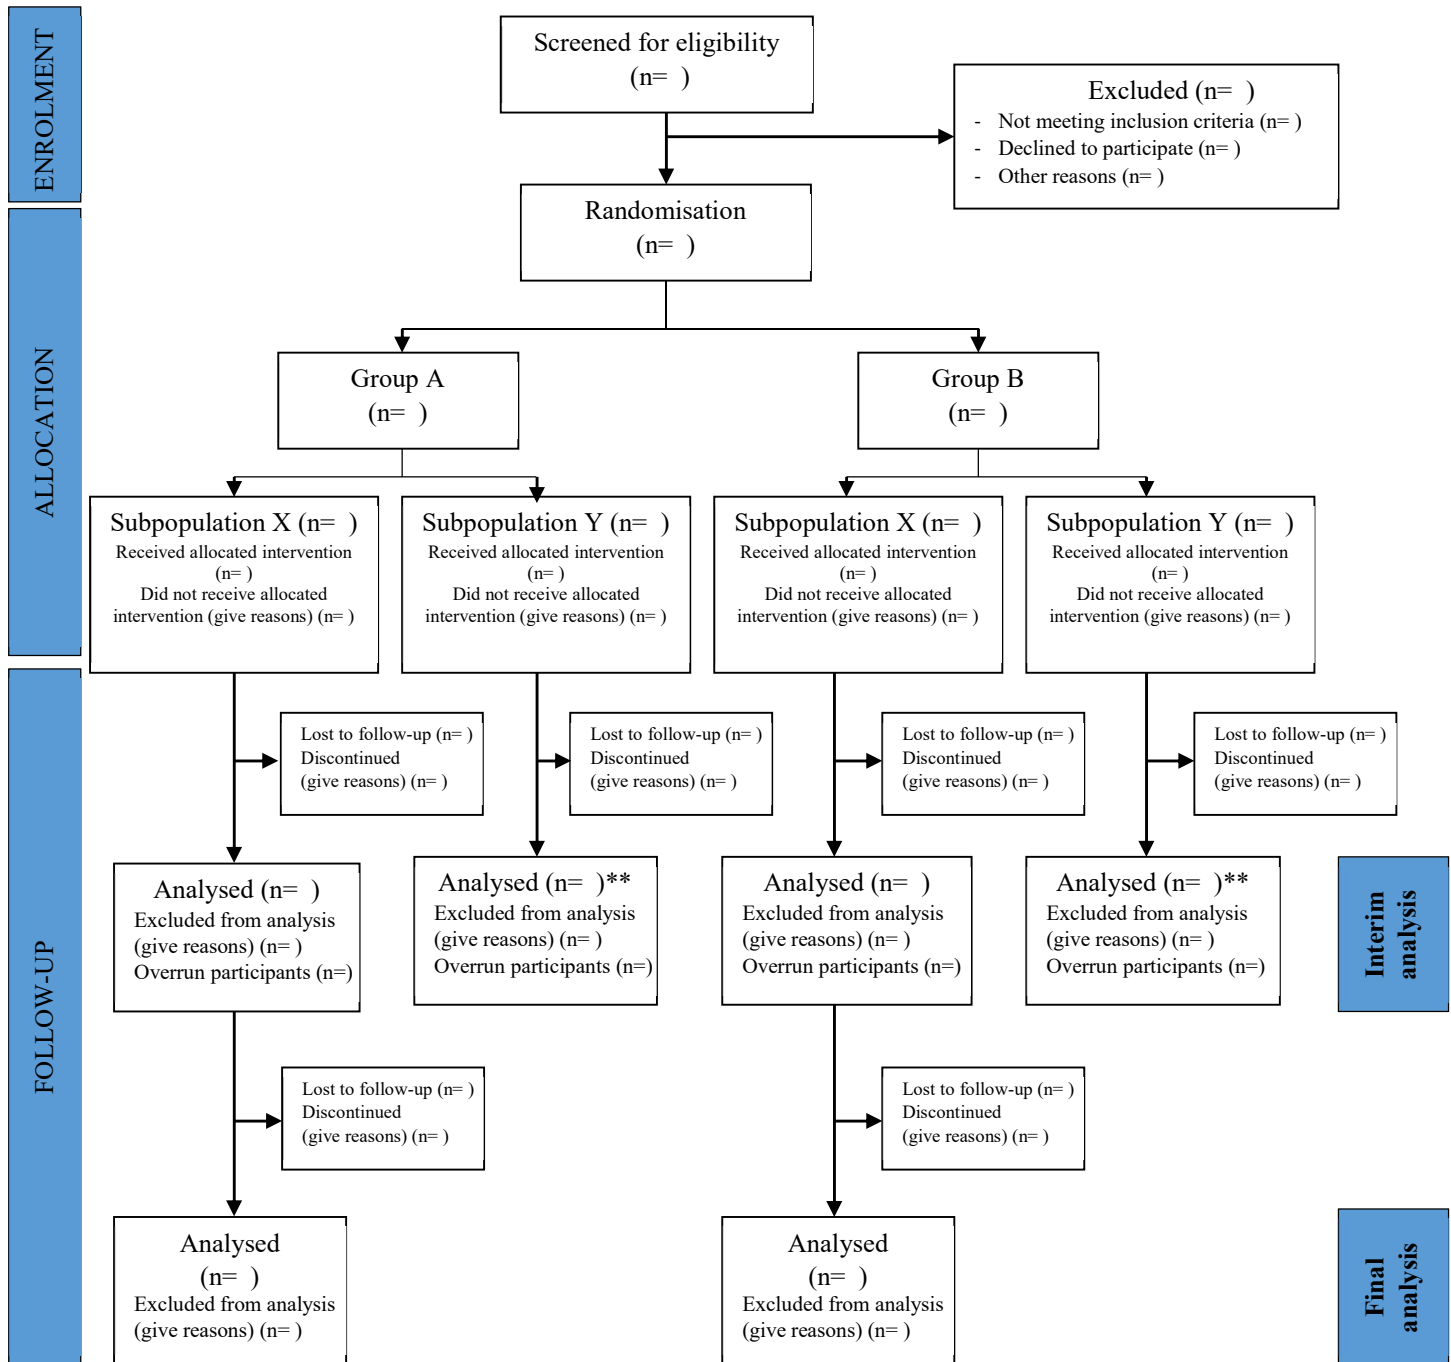

\*\* This can be extended to the final analysis if an additional analysis was performed after an interim analysis when further recruitment to a specific subpopulation was stopped (e.g. to include overrun participants who did not contribute to the interim analysis or long-term outcome data)
