# Supplementary material for: The Adaptive designs CONSORT Extension (ACE) statement: a checklist with explanation and elaboration guideline for reporting randomised trials that use an adaptive design
Source: PubMed Central journal article supplement (PMC7298567; doi:10.1136/bmj.m115), 2020-06-17

**Appendix G: An example of a CONSORT flowchart for reporting a response-adaptive randomisation adaptive design with frequent randomisation updates**

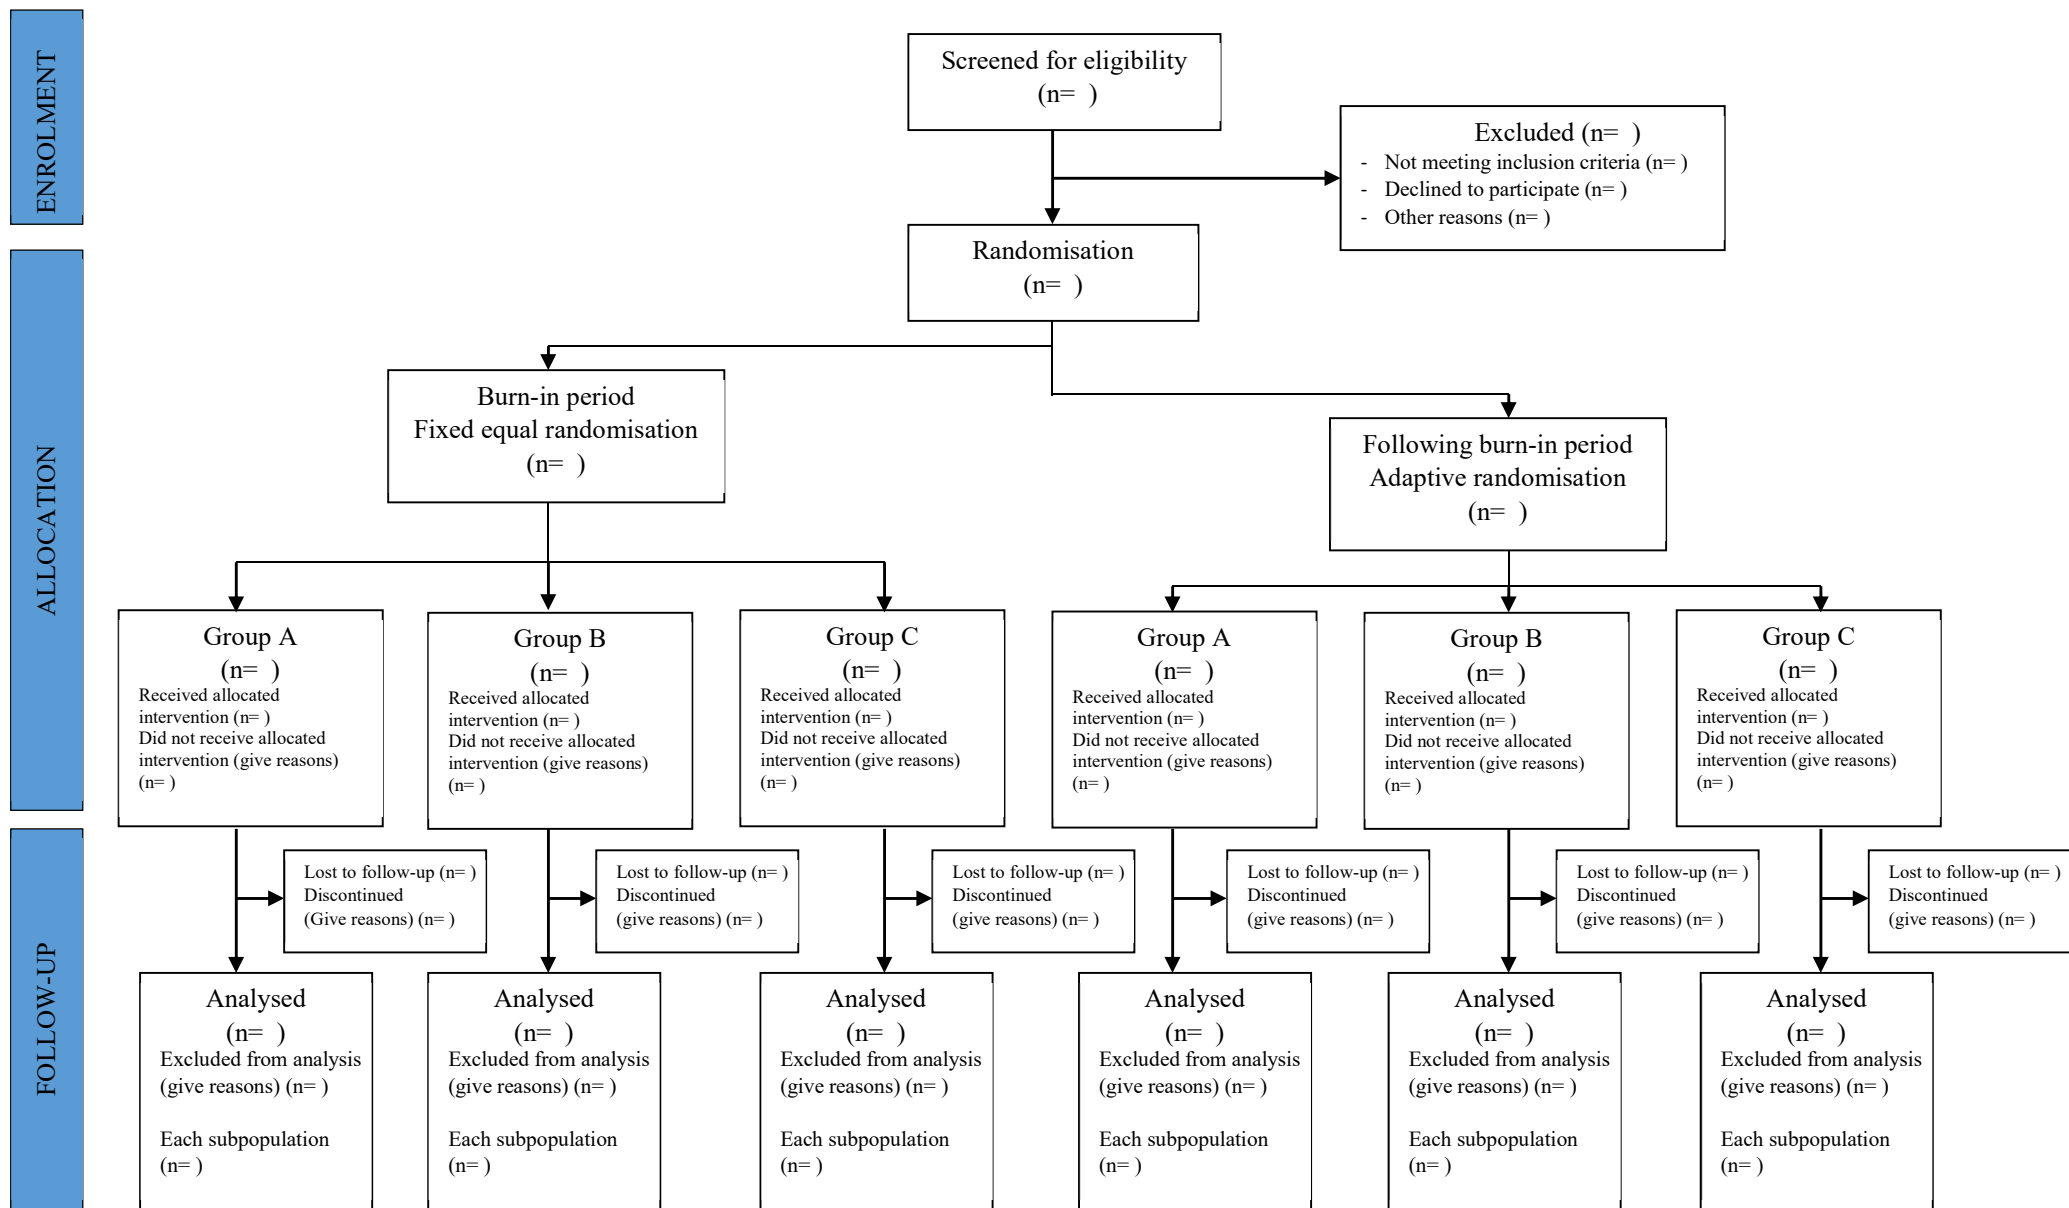

Supplement: dimm050350.w7.pdf [file dimm050350.w7.pdf]
